# Supplementary material for: Detecting hydrogen peroxide reliably in water via ion chromatography: a method evaluation update and comparison in the presence of interfering components
Source: Royal Society of Chemistry journal article supplement (doi:10.1039/d0ew00234h), 2020-01-01
Supplement: d0ew00234h1.pdf [file d0ew00234h1.pdf]

## Supporting Information

### **Detecting hydrogen peroxide reliably in water by ion chromatography: a method evaluation update and comparison in the presence of interfering components**

**Yuanxi Huang<sup>a</sup>, Lei Wang<sup>a</sup>, Baiyang Chen<sup>a\*</sup>, Qi Zhang<sup>a</sup>, Rongshu Zhu<sup>a\*</sup>**

<sup>a</sup> Shenzhen Key Laboratory of Organic Pollution Prevention and Control, Harbin Institute of Technology, Shenzhen 518055, China

\*Corresponding author. Phone: 86-134-8072-7605; Emails: chen.baiyang@hit.edu.cn, rszhu@hit.edu.cn

Total pages: 6, including cover page

Number of figures: 3

Number of tables: 2

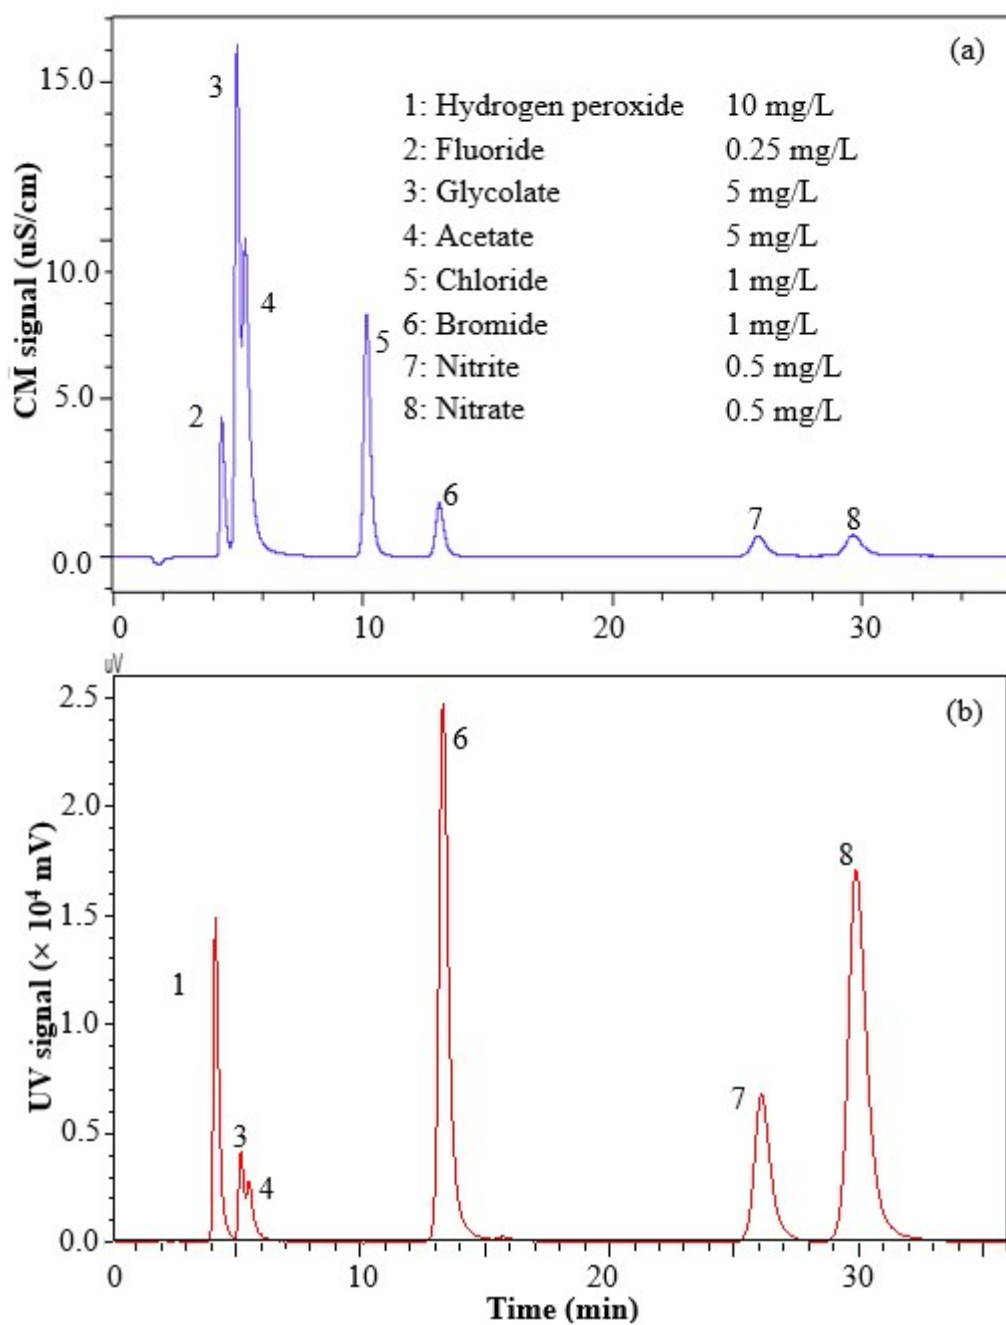

Figure S1. A depiction of H<sub>2</sub>O<sub>2</sub> and typical anions' chromatograms in water by IC with (a) conductivity meter (CM) and (b) UV detector.

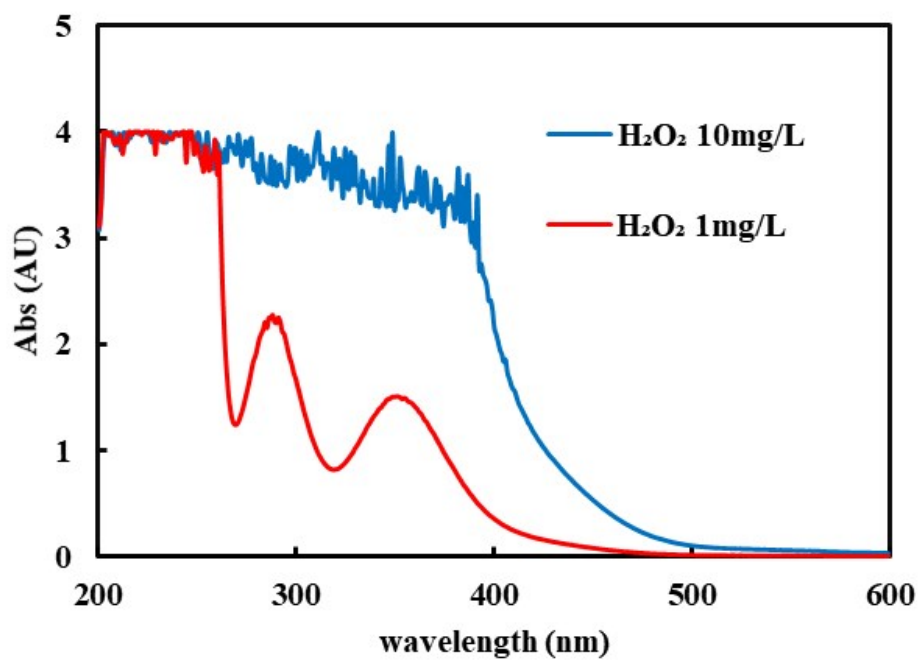

**Figure S2. The spectra of waters spiked with H<sub>2</sub>O<sub>2</sub> and KI as measured by the colorimetric method.**

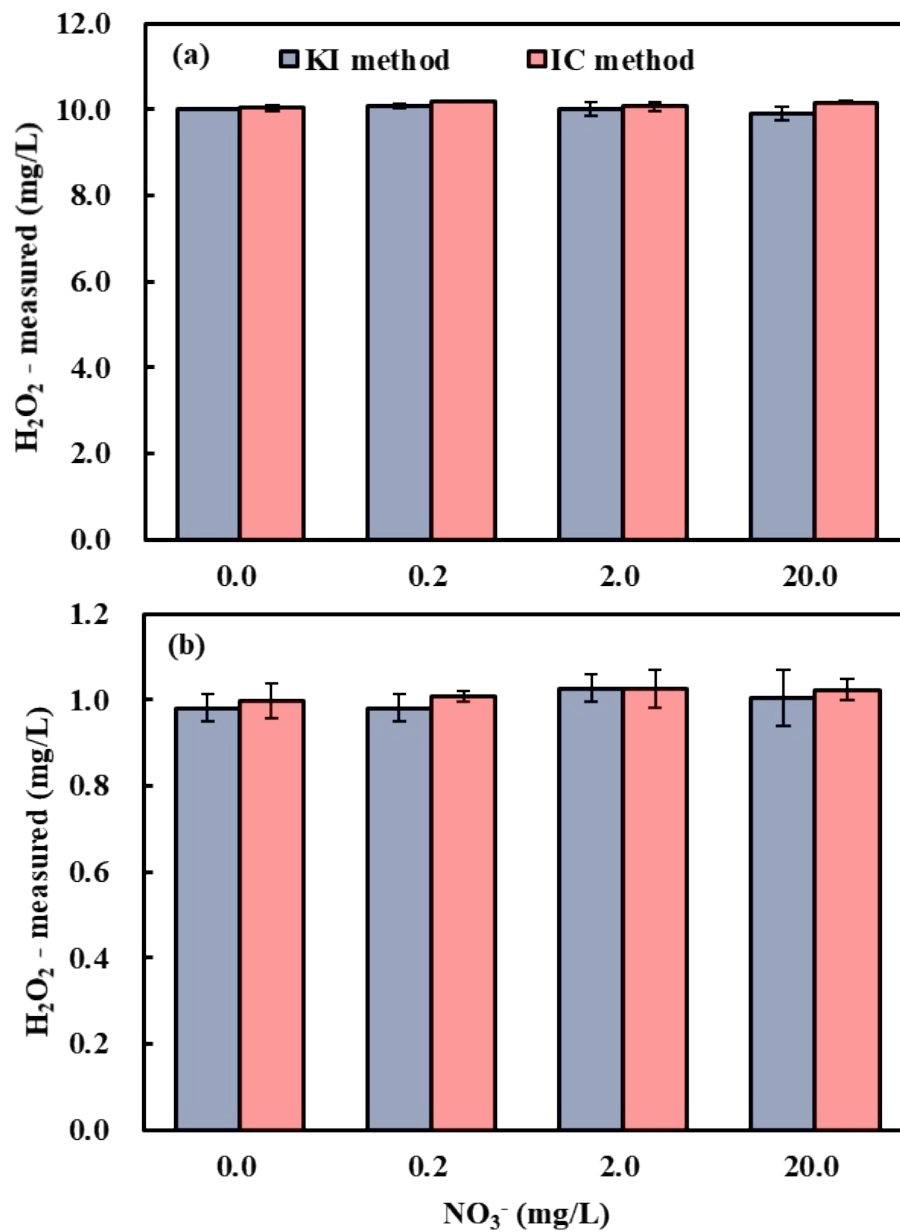

**Figure S3. A comparison of the IC and KI methods under the influences of nitrate for H<sub>2</sub>O<sub>2</sub> measurement at (a) 2.0 mg/L and (b) 10.0 mg/L H<sub>2</sub>O<sub>2</sub>.**

**Table S1. H<sub>2</sub>O<sub>2</sub> MDLs calculation for (a) the KI method and (b) the IC method.**

| <b>(a) Test concentration = 30 µg/L</b> |                    |                            |
|-----------------------------------------|--------------------|----------------------------|
| Sample #                                | C (µg/L)           |                            |
| 1                                       | 33.60              |                            |
| 2                                       | 29.40              |                            |
| 3                                       | 34.65              |                            |
| 4                                       | 36.75              |                            |
| 5                                       | 34.65              |                            |
| 6                                       | 27.30              |                            |
| 7                                       | 28.35              |                            |
| 8                                       | 30.45              |                            |
| 9                                       | 43.04              |                            |
| 10                                      | 44.09              |                            |
| n                                       | 10                 |                            |
| Average                                 | 34.23              |                            |
| Variance                                | 33.61              |                            |
| StDev                                   | 5.80               |                            |
| t (n-1, 0.01)                           | 2.82               |                            |
| t value for 99% at n (from Table)       |                    |                            |
| MDL(t *StDev)                           | 16.35              |                            |
| C-MDL=                                  | 13.65              |                            |
| MDL*10-C=                               | 133.53             |                            |
| S/N=                                    | 5.90               |                            |
| MDL (µg/L)=                             | 16.35              |                            |
| LOQ (µg/L)=                             | 57.97              |                            |
| X <sup>2</sup> (n-1, 0.975)             | 2.70               |                            |
| X <sup>2</sup> (n-1, 0.025)             | 19.02              |                            |
|                                         | X <sup>2</sup> /df | (X <sup>2</sup> /df) (MDL) |
| LCL                                     | 0.30               | 4.91                       |
| UCL                                     | 2.11               | 34.6                       |
| <b>(b) Test concentration = 5 µg/L</b>  |                    |                            |
| Sample #                                | C (µg/L)           |                            |
| 1                                       | 2.79               |                            |
| 2                                       | 2.32               |                            |
| 3                                       | 4.40               |                            |
| 4                                       | 3.26               |                            |
| 5                                       | 2.70               |                            |
| 6                                       | 3.36               |                            |
| 7                                       | 4.49               |                            |
| 8                                       | 4.21               |                            |
| 9                                       | 2.88               |                            |
| 10                                      | 3.45               |                            |
| n                                       | 10                 |                            |
| Average                                 | 3.39               |                            |
| Variance                                | 0.57               |                            |
| StDev                                   | 0.76               |                            |
| t (n-1, 0.01)                           | 2.82               |                            |
| t value for 99% at n (from Table)       |                    |                            |
| MDL(t *StDev)                           | 2.14               |                            |
| C-MDL=                                  | 2.86               |                            |
| MDL*10-C=                               | 16.38              |                            |
| S/N=                                    | 4.47               |                            |
| MDL (µg/L)=                             | 2.14               |                            |
| LOQ (µg/L)=                             | 7.58               |                            |
| X <sup>2</sup> (n-1, 0.975)             | 2.70               |                            |
| X <sup>2</sup> (n-1, 0.025)             | 19.02              |                            |
|                                         | X <sup>2</sup> /df | (X <sup>2</sup> /df) (MDL) |
| LCL                                     | 0.3                | 0.6                        |
| UCL                                     | 2.1                | 4.5                        |

**Table S2. Common characteristics of the tap water used for the photolysis tests.**

| Parameters                   | Unit                  | Value |
|------------------------------|-----------------------|-------|
| NPOC                         | mg-C/L                | 1.44  |
| TN                           | mg-N/L                | 1.43  |
| Free chlorine                | mg-Cl <sub>2</sub> /L | 0.16  |
| UV <sub>254</sub>            | 1/cm                  | 0.03  |
| NO <sub>3</sub> <sup>-</sup> | mg/L                  | 6.02  |
| NO <sub>2</sub> <sup>-</sup> | mg/L                  | 0.00  |
| pH                           | /                     | 6.80  |

NPOC: non-purgeable organic carbon; TN: total nitrogen.
